# Supplementary material for: Low-level cadmium exposure and effects on kidney function
Source: HighWire-hosted journal article supplement (doi:10.1136/oemed-2014-102279), 2014-10-06
Supplement: oemed-2014-102279supp.pdf [file oemed-2014-102279supp.pdf]

**Supplemental material. Table S1. Medians (interquartile ranges) of selected kidney function markers, stratified by sex, age, BMI, smoking, and tertiles (T1-T3) of kidney cadmium, blood cadmium, and urinary cadmium adjusted for creatinine.**

|                                | GFR (mL/min) | 24h U-Crea (mmol/L) | ON U-Crea (mmol/L) | 24h U-Alb/h (mg/h) | 24h U-AlbCrea (mg/gC) | ON U-Alb/h (mg/h) | ON U-AlbCrea (mg/gC) | 24h U-A1M/h (mg/h) | 24h U-A1MCrea (mg/gC) | ON U-A1M/h (mg/h) | ON U-A1MCrea (mg/gC) |
|--------------------------------|--------------|---------------------|--------------------|--------------------|-----------------------|-------------------|----------------------|--------------------|-----------------------|-------------------|----------------------|
| <b>All</b>                     | 98 (21.5)    | 6.5 (3.6)           | 11.0 (8.2)         | 0.24 (0.14)        | 4.5 (3.5)             | 0.20 (0.13)       | 4.0 (2.2)            | 0.36 (0.16)        | 7.0 (3.3)             | 0.23 (0.14)       | 4.4 (3.5)            |
| <b>Men</b>                     | 99 (20)      | 8.1 (3.45)          | 13 (6.15)          | 0.24 (0.18)        | 3.7 (2.0)             | 0.22 (0.15)       | 3.4 (2.1)            | 0.38 (0.15)        | 5.9 (2.9)             | 0.25 (0.13)       | 3.7 (2.8)            |
| <b>Women</b>                   | 97 (22)      | 5.5 (2.4)           | 9.7 (8.8)          | 0.24 (0.13)        | 5.2 (3.9)             | 0.18 (0.08)       | 4.2 (2.0)            | 0.34 (0.15)        | 7.7 (2.8)             | 0.20 (0.13)       | 4.7 (3.2)            |
| <b>Age&lt;51 years</b>         | 101.5 (23.5) | 6.5 (3.3)           | 12.0 (10.1)        | 0.28 (0.20)        | 4.2 (4.5)             | 0.18 (0.14)       | 3.7 (1.7)            | 0.41 (0.15)        | 7.1 (2.7)             | 0.24 (0.14)       | 4.0 (3.4)            |
| <b>Age≥51 years</b>            | 94 (15.5)    | 6.4 (3.6)           | 10.0 (8.4)         | 0.23 (0.09)        | 4.6 (2.4)             | 0.20 (0.14)       | 4.3 (2.6)            | 0.34 (0.11)        | 7.0 (3.2)             | 0.23 (0.12)       | 4.5 (3.5)            |
| <b>BMI&lt;25</b>               | 96 (20)      | 5.9 (3.2)           | 10.0 (6.9)         | 0.23 (0.11)        | 4.3 (3.3)             | 0.17 (0.08)       | 3.7 (1.8)            | 0.35 (0.24)        | 7.6 (4.2)             | 0.22 (0.16)       | 5.2 (3.5)            |
| <b>BMI≥25</b>                  | 99 (21)      | 6.8 (3.9)           | 12.0 (9.1)         | 0.25 (0.21)        | 4.6 (4.1)             | 0.22 (0.13)       | 4.6 (4.1)            | 0.37 (0.14)        | 6.7 (2.5)             | 0.24 (0.13)       | 4.0 (2.9)            |
| <b>Never-smokers</b>           | 95 (15)      | 7.0 (2.95)          | 13.0 (7.0)         | 0.24 (0.18)        | 4.2 (4.8)             | 0.18 (0.17)       | 3.5 (2.9)            | 0.37 (0.14)        | 7.2 (2.2)             | 0.22 (0.13)       | 3.9 (4.0)            |
| <b>Ever-smokers</b>            | 100 (20)     | 6.3 (3.5)           | 9.9 (7.5)          | 0.24 (0.14)        | 4.6 (2.6)             | 0.20 (0.13)       | 4.1 (2.1)            | 0.36 (0.16)        | 7.0 (3.6)             | 0.23 (0.15)       | 4.7 (2.9)            |
| <b>K-Cd (µg/g ww)T1</b>        | 96.5 (14)    | 7.6 (3.9)           | 14.0 (7.3)         | 0.23 (0.19)        | 4.9 (4.5)             | 0.22 (0.18)       | 3.5 (2.6)            | 0.37 (0.11)        | 5.9 (2.8)             | 0.20 (0.11)       | 2.9 (1.8)            |
| <b>K-Cd (µg/g ww) T2</b>       | 100 (22)     | 6.4 (3.1)           | 10 (8.5)           | 0.24 (0.14)        | 5.3 (3.5)             | 0.19 (0.11)       | 4.1 (2.3)            | 0.36 (0.17)        | 7.4 (3.4)             | 0.22 (0.14)       | 4.5 (3.2)            |
| <b>K-Cd (µg/g ww) T3</b>       | 97.5 (24.5)  | 6.3 (2.8)           | 8.9 (6.8)          | 0.23 (0.14)        | 4.4 (2.4)             | 0.20 (0.09)       | 4.0 (2.1)            | 0.34 (0.18)        | 7.5 (3.8)             | 0.26 (0.24)       | 5.5 (3.8)            |
| <b>B-Cd (µg/L) T1</b>          | 96 (12)      | 7.2 (3.9)           | 12.5 (7.7)         | 0.23 (0.18)        | 3.7 (3.5)             | 0.18 (0.14)       | 3.3 (2.6)            | 0.36 (0.10)        | 6.2 (2.9)             | 0.22 (0.11)       | 3.4 (2.9)            |
| <b>B-Cd (µg/L) T2</b>          | 95 (17.5)    | 6.7 (3.8)           | 12.0 (8.9)         | 0.24 (0.11)        | 4.5 (2.2)             | 0.20 (0.08)       | 3.6 (1.8)            | 0.38 (0.15)        | 6.9 (2.2)             | 0.21 (0.14)       | 4.0 (3.3)            |
| <b>B-Cd (µg/L) T3</b>          | 102 (24)     | 6.2 (2.5)           | 9.1 (7.8)          | 0.28 (0.16)        | 5.4 (5.6)             | 0.21 (0.15)       | 4.2 (3.2)            | 0.36 (0.22)        | 8.3 (4.5)             | 0.27 (0.11)       | 5.2 (3.7)            |
| <b>24h U-CdCrea (µg/gC) T1</b> | 97 (24)      | 7.0 (3.5)           | 13.0 (9.2)         | 0.25 (0.18)        | 4.0 (3.1)             | 0.20 (0.16)       | 3.9 (2.2)            | 0.37 (0.12)        | 6.8 (2.7)             | 0.23 (0.13)       | 4.0 (3.0)            |
| <b>24h U-CdCrea (µg/gC) T2</b> | 98 (17)      | 6.3 (3.7)           | 10.0 (6.9)         | 0.23 (0.10)        | 4.0 (2.2)             | 0.19 (0.08)       | 3.6 (1.3)            | 0.36 (0.18)        | 6.8 (4.2)             | 0.22 (0.13)       | 4.5 (2.9)            |
| <b>24h U-CdCrea (µg/gC) T3</b> | 98 (21)      | 6.3 (2.5)           | 10.0 (8.8)         | 0.26 (0.14)        | 5.0 (3.7)             | 0.20 (0.14)       | 4.9 (2.1)            | 0.34 (0.16)        | 7.9 (3.8)             | 0.23 (0.17)       | 5.2 (4.6)            |
| <b>ON U-CdCrea (µg/gC) T1</b>  | 95 (15)      | 7.0 (3.6)           | 13.0 (9.0)         | 0.24 (0.28)        | 4.0 (5.6)             | 0.18 (0.19)       | 3.3 (2.5)            | 0.37 (0.15)        | 6.8 (2.1)             | 0.22 (0.11)       | 3.7 (2.3)            |
| <b>ON U-CdCrea (µg/gC) T2</b>  | 100 (23)     | 6.3 (4.0)           | 12.0 (7.9)         | 0.24 (0.14)        | 4.3 (2.8)             | 0.19 (0.08)       | 3.9 (1.4)            | 0.31 (0.12)        | 6.7 (3.3)             | 0.20 (0.12)       | 4.0 (2.7)            |
| <b>ON U-CdCrea (µg/gC) T3</b>  | 96 (19.5)    | 5.9 (2.7)           | 9.4 (5.7)          | 0.24 (0.14)        | 4.8 (2.1)             | 0.20 (0.13)       | 4.4 (2.1)            | 0.36 (0.16)        | 8.1 (4.0)             | 0.27 (0.19)       | 5.3 (4.1)            |

**Supplemental material. Table S2. Correlations between K-/B-/U-Cd and markers of kidney function, per hour and normalized for creatinine (Spearman correlation coefficients).**

|                                                        | K-Cd ( $\mu\text{g/g}$<br>ww) <sup>a</sup> | B-Cd ( $\mu\text{g/L}$ ) | 24h U-Cd24<br>( $\mu\text{g}/24\text{h}$ ) <sup>b</sup> | ON U-Cd/h<br>( $\mu\text{g}/\text{h}$ ) <sup>c</sup> | 24h U-<br>CdCrea<br>( $\mu\text{g}/\text{gC}$ ) <sup>d</sup> | ON U-<br>CdCrea<br>( $\mu\text{g}/\text{gC}$ ) <sup>d</sup> |
|--------------------------------------------------------|--------------------------------------------|--------------------------|---------------------------------------------------------|------------------------------------------------------|--------------------------------------------------------------|-------------------------------------------------------------|
| GFR (mL/min/1.73 m <sup>2</sup> )                      | -0.008                                     | 0.10                     | 0.11                                                    | 0.13                                                 | 0.03                                                         | 0.07                                                        |
| eGFR (ml/min/1.73 m <sup>2</sup> )                     | -0.01                                      | -0.13                    | -0.21                                                   | -0.22*                                               | -0.33***                                                     | -0.23*                                                      |
| S-Cystatin (mg/L)                                      | -0.11                                      | 0.08                     | 0.16                                                    | 0.12                                                 | 0.22                                                         | 0.11                                                        |
| 24h U-Alb/h (mg/h) <sup>c</sup>                        | -0.07                                      | -0.01                    | 0.14                                                    |                                                      | 0.02                                                         |                                                             |
| 24h U-AlbCrea (mg/gC) <sup>d</sup>                     | 0.19                                       | 0.21                     | 0.12                                                    |                                                      | 0.32*                                                        |                                                             |
| ON U-Alb/h (mg/h) <sup>c</sup>                         | -0.05                                      | 0.05                     |                                                         | 0.32*                                                |                                                              | 0.12                                                        |
| ON U-AlbCrea (mg/gC) <sup>d</sup>                      | 0.15                                       | 0.23*                    |                                                         | 0.29*                                                |                                                              | 0.41*                                                       |
| 24h U-KIM/h (ng/h) <sup>c</sup>                        | 0.07                                       | 0.07                     | 0.34*                                                   |                                                      | 0.17                                                         |                                                             |
| 24h U-KIMCrea (ng/mgC) <sup>d</sup>                    | 0.26*                                      | 0.32*                    | 0.33*                                                   |                                                      | 0.43*                                                        |                                                             |
| ON U-KIM/h (ng/h) <sup>c</sup>                         | 0.07                                       | 0.11                     |                                                         | 0.30*                                                |                                                              | 0.16                                                        |
| ON U-KIMCrea (ng/mgC) <sup>d</sup>                     | 0.09                                       | 0.28*                    |                                                         | 0.31*                                                |                                                              | 0.39*                                                       |
| 24h U-NAG/h (U/h) <sup>c</sup>                         | 0.04                                       | -0.03                    | 0.18                                                    |                                                      | -0.03                                                        |                                                             |
| 24h U-NAGCrea (U/gC) <sup>d</sup>                      | 0.34*                                      | 0.32*                    | 0.36*                                                   |                                                      | 0.40*                                                        |                                                             |
| ON U-NAG/h (U/h) <sup>c</sup>                          | -0.03                                      | 0.11                     |                                                         | 0.29*                                                |                                                              | 0.15                                                        |
| ON U-NAGCrea (U/gC) <sup>d</sup>                       | 0.20                                       | 0.33*                    |                                                         | 0.36*                                                |                                                              | 0.43*                                                       |
| 24h U-A1M/h (mg/h) <sup>c</sup>                        | -0.11                                      | -0.02                    | 0.04                                                    |                                                      | -0.12                                                        |                                                             |
| 24h U-A1MCrea (mg/gC) <sup>d</sup>                     | 0.27*                                      | 0.29*                    | 0.11                                                    |                                                      | 0.32*                                                        |                                                             |
| ON U-A1M/h (mg/h) <sup>c</sup>                         | 0.18                                       | 0.16                     |                                                         | 0.30*                                                |                                                              | 0.15                                                        |
| ON U-A1MCrea (mg/gC) <sup>d</sup>                      | 0.36*                                      | 0.29*                    |                                                         | 0.27*                                                |                                                              | 0.36*                                                       |
| 24h U-B2M/h (mg/h) <sup>c</sup>                        | -0.02                                      | -0.02                    | -0.14                                                   |                                                      | -0.18                                                        |                                                             |
| 24h U-B2MCrea (mg/gC) <sup>d</sup>                     | 0.18                                       | 0.16                     | -0.09                                                   |                                                      | 0.06                                                         |                                                             |
| ON U-B2M/h (mg/h) <sup>c</sup>                         | -0.11                                      | -0.02                    |                                                         | -0.06                                                |                                                              | -0.15                                                       |
| ON U-B2MCrea (mg/gC) <sup>d</sup>                      | 0.01                                       | 0.07                     |                                                         | -0.07                                                |                                                              | -0.003                                                      |
| 24h U-RBP/h ( $\mu\text{g}/\text{h}$ ) <sup>c</sup>    | -0.06                                      | -0.07                    | 0.16                                                    |                                                      | -0.008                                                       |                                                             |
| 24h U-RBPCrea ( $\mu\text{g}/\text{gC}$ ) <sup>d</sup> | 0.20                                       | 0.23*                    | 0.24*                                                   |                                                      | 0.31*                                                        |                                                             |
| ON U-RBP/h ( $\mu\text{g}/\text{h}$ ) <sup>c</sup>     | 0.03                                       | 0.12                     |                                                         | 0.32*                                                |                                                              | 0.15                                                        |
| ON U-RBPCrea ( $\mu\text{g}/\text{gC}$ ) <sup>d</sup>  | 0.24*                                      | 0.33*                    |                                                         | 0.35*                                                |                                                              | 0.40*                                                       |

\*p < 0.05. \*\*\*p < 0.005. ON = overnight sample. 24h = 24-hour sample. <sup>a</sup>Wet weight. <sup>b</sup>Urinary cadmium excretion rate expressed per 24 hours. <sup>c</sup>Excretion rate in urine expressed per hour. <sup>d</sup>Concentration in urine adjusted for urinary creatinine concentration.

Supplemental material. Table S3. Alfa-1-microglobulin in urine. Correlations between parameters (Spearman correlation coefficients).

|                                          | K-Cd<br>( $\mu\text{g/g}$<br>ww) <sup>a</sup> | Age   | Weight | Pack-<br>years | 24-h urinary<br>flow rate<br>(ml/h) | ON urinary<br>flow rate<br>(ml/h) | 24h U-<br>A1M/h<br>(mg/h) <sup>b</sup> | 24h U-<br>A1MCrea<br>(mg/gC) <sup>c</sup> | ON U-<br>A1M/h<br>(mg/h) <sup>b</sup> | ON U-<br>A1MCrea<br>(mg/gC) <sup>c</sup> |
|------------------------------------------|-----------------------------------------------|-------|--------|----------------|-------------------------------------|-----------------------------------|----------------------------------------|-------------------------------------------|---------------------------------------|------------------------------------------|
| K-Cd ( $\mu\text{g/g ww}$ ) <sup>a</sup> |                                               | 0.28* | -0.29* | 0.51*          | -0.15                               | 0.06                              | -0.11                                  | 0.27*                                     | 0.18                                  | 0.36*                                    |
| Age                                      |                                               |       | -0.02  | 0.06           | -0.28*                              | 0.04                              | -0.26*                                 | 0.08                                      | 0.04                                  | 0.16                                     |
| Weight                                   |                                               |       |        | -0.08          | -0.09                               | 0.05                              | 0.05                                   | -0.49*                                    | 0.008                                 | -0.38*                                   |
| Pack-years                               |                                               |       |        |                | -0.05                               | 0.08                              | -0.05                                  | 0.11                                      | 0.07                                  | 0.13                                     |
| 24h urinary flow<br>rate (ml/h)          |                                               |       |        |                |                                     | 0.45*                             | 0.66*                                  | 0.35*                                     |                                       |                                          |
| ON urinary flow<br>rate (ml/h)           |                                               |       |        |                |                                     |                                   |                                        |                                           | 0.77*                                 | 0.61*                                    |
| 24h U-A1M<br>(mg/h) <sup>b</sup>         |                                               |       |        |                |                                     |                                   |                                        | 0.57*                                     | 0.44*                                 | 0.32*                                    |
| 24 U-A1MCrea<br>(mg/gC) <sup>c</sup>     |                                               |       |        |                |                                     |                                   |                                        |                                           | 0.33*                                 | 0.66*                                    |
| ON U-A1M/h<br>(mg/h) <sup>b</sup>        |                                               |       |        |                |                                     |                                   |                                        |                                           |                                       | 0.78                                     |

ON=overnight sample. 24h=24-hour sample. \* $p < 0.05$ . <sup>a</sup> Wet weight. <sup>b</sup> Excretion rate in urine expressed per hour. <sup>c</sup> Concentration in urine adjusted for urinary creatinine concentration.

Supplemental Material, Table S4. U-NAG. Correlations between parameters (Spearman correlation coefficients).

|                                         | K-Cd<br>( $\mu\text{g/g}$<br>ww) <sup>a</sup> | Age   | Weight | Pack-<br>years | 24-h urinary<br>flow rate<br>(ml/h) | ON urinary<br>flow rate<br>(ml/h) | 24h U-<br>NAG/h<br>(U/h) <sup>b</sup> | 24h U-<br>NAGCrea<br>(U/gC) <sup>c</sup> | ON U-<br>NAG/h<br>(U/h) <sup>b</sup> | ON U-<br>NAGCrea<br>(U/gC) <sup>c</sup> |
|-----------------------------------------|-----------------------------------------------|-------|--------|----------------|-------------------------------------|-----------------------------------|---------------------------------------|------------------------------------------|--------------------------------------|-----------------------------------------|
| K-Cd ( $\mu\text{g/g}$ ww) <sup>a</sup> |                                               | 0.28* | -0.29* | 0.51*          | -0.15                               | 0.06                              | 0.04                                  | 0.34*                                    | -0.03                                | 0.20                                    |
| Age                                     |                                               |       | -0.02  | 0.06           | -0.28*                              | 0.04                              | 0.03                                  | 0.10                                     | 0.06                                 | 0.21                                    |
| Weight                                  |                                               |       |        | -0.08          | -0.09                               | 0.05                              | 0.12                                  | -0.31*                                   | 0.15                                 | -0.13                                   |
| Pack-years                              |                                               |       |        |                | -0.05                               | 0.08                              | 0.20                                  | 0.29*                                    | 0.22                                 | 0.25                                    |
| 24h urinary flow<br>rate (ml/h)         |                                               |       |        |                |                                     | 0.45*                             | -0.04                                 | -0.21                                    |                                      |                                         |
| ON urinary flow<br>rate (ml/h)          |                                               |       |        |                |                                     |                                   |                                       |                                          | 0.07                                 | -0.10                                   |
| 24h U-NAG/h<br>(U/h) <sup>b</sup>       |                                               |       |        |                |                                     |                                   |                                       | 0.64*                                    | 0.55*                                | 0.50                                    |
| 24 U-NAGCrea<br>(U/gC) <sup>c</sup>     |                                               |       |        |                |                                     |                                   |                                       |                                          | 0.44*                                | 0.82*                                   |
| ON U-NAG/h<br>(U/h) <sup>b</sup>        |                                               |       |        |                |                                     |                                   |                                       |                                          |                                      | 0.75*                                   |

ON=overnight sample. 24h=24-hour sample. \*p<0.05. <sup>a</sup> Wet weight. <sup>b</sup> Excretion rate in urine expressed per hour. <sup>c</sup> Concentration in urine adjusted for urinary creatinine concentration.

Supplemental Material, Table S5. U-KIM. Correlations between parameters (Spearman correlation coefficients).

|                                         | K-Cd<br>( $\mu\text{g/g}$<br>ww) <sup>a</sup> | Age   | Weight | Pack-<br>years | 24-h urinary<br>flow rate<br>(ml/h) | ON urinary<br>flow rate<br>(ml/h) | 24h U-<br>KIM/h<br>(ng/h) <sup>b</sup> | 24h U-<br>KIMCrea<br>(ng/mgC) <sup>c</sup> | ON U-<br>KIM/h<br>(ng/h) <sup>b</sup> | ON U-<br>KIMCrea<br>(ng/mgC) <sup>c</sup> |
|-----------------------------------------|-----------------------------------------------|-------|--------|----------------|-------------------------------------|-----------------------------------|----------------------------------------|--------------------------------------------|---------------------------------------|-------------------------------------------|
| K-Cd ( $\mu\text{g/g}$ ww) <sup>a</sup> |                                               | 0.28* | -0.29* | 0.51*          | -0.15                               | 0.06                              | 0.07                                   | 0.26*                                      | -0.07                                 | 0.09                                      |
| Age                                     |                                               |       | -0.02  | 0.06           | -0.28*                              | 0.04                              | 0.12                                   | 0.26*                                      | 0.08                                  | 0.15                                      |
| Weight                                  |                                               |       |        | -0.08          | -0.09                               | 0.05                              | 0.19                                   | -0.14                                      | 0.23*                                 | -0.09                                     |
| Pack-years                              |                                               |       |        |                | -0.05                               | 0.08                              | 0.19                                   | 0.33*                                      | 0.22*                                 | 0.28*                                     |
| 24h urinary flow<br>rate (ml/h)         |                                               |       |        |                |                                     | 0.45*                             | -0.19                                  | -0.32*                                     |                                       |                                           |
| ON urinary flow<br>rate (ml/h)          |                                               |       |        |                |                                     |                                   |                                        |                                            | 0.12                                  | -0.04                                     |
| 24h U-KIM/h<br>(ng/h) <sup>b</sup>      |                                               |       |        |                |                                     |                                   |                                        | 0.82*                                      | 0.69*                                 | 0.58*                                     |
| 24 U-KIMCrea<br>(ng/mgC) <sup>c</sup>   |                                               |       |        |                |                                     |                                   |                                        |                                            | 0.66*                                 | 0.78*                                     |
| ON KIM/h<br>(ng/h) <sup>b</sup>         |                                               |       |        |                |                                     |                                   |                                        |                                            |                                       | 0.85*                                     |

ON=overnight sample. 24h=24-hour sample. \* $p < 0.05$ . <sup>a</sup> Wet weight. <sup>b</sup> Excretion rate in urine expressed per hour. <sup>c</sup> Concentration in urine adjusted for urinary creatinine concentration.
